# Supplementary material for: Novel hybridized SWCNT–PCD: synthesis and host–guest inclusion for electrical sensing recognition of persistent organic pollutants
Source: Royal Society of Chemistry journal article supplement (doi:10.1039/c0jm04552g), 2011-01-01
Supplement: c0jm04552g.pdf [file c0jm04552g.pdf]

## Novel Hybridized SWCNT-PCD: Synthesis and Host-Guest Inclusion for Electrical Sensing Recognition of Persistent Organic Pollutants

Lingtao Kong, Jin Wang, Fanli Meng, Xing Chen, Zhen Jin, Jinhui Liu\* and Xing-Jiu Huang\*

*Research Center for Biomimetic Functional Materials and Sensing Devices, Institute of Intelligent  
Machines, Chinese Academy of Sciences, Hefei, Anhui, 230031, P. R. China*

### Electronic Supporting Information

**Table S1** Complex Stability Constant (K), Standard Gibbs free energy ( $\Delta G^\circ$ ), Standard Enthalpy changes ( $\Delta H^\circ$ ) and Entropy Changes ( $T\Delta S^\circ$ ) values obtained for the 1:1 inclusion complexes of the PCD with different POPs at T = 298.15 K

| POPs   | K/M <sup>-1</sup> | $-\Delta G^\circ/\text{kJ mol}^{-1}$ | $-\Delta H^\circ/\text{kJ mol}^{-1}$ | $T\Delta S^\circ/\text{kJ mol}^{-1}$ |
|--------|-------------------|--------------------------------------|--------------------------------------|--------------------------------------|
| TCB    | 9145 ± 229        | 22.59 ± 0.07                         | 26.58 ± 0.08                         | -3.99                                |
| Aldrin | 3613 ± 42         | 20.3 ± 0.03                          | 22.8 ± 0.04                          | 2.4                                  |
| CD-68  | 2667 ± 32         | 19.55 ± 0.08                         | 23.97 ± 0.1                          | -4.42                                |
| Mirex  | 1968 ± 15         | 18.8 ± 0.03                          | 11.7 ± 0.3                           | 7.1                                  |
| HCB    | 823 ± 36          | 16.63 ± 0.1                          | 25.83 ± 0.2                          | -9.20                                |
